# Supplementary material for: Novel nitrogen-containing mesoporous carbons prepared from chitosan
Source: Royal Society of Chemistry journal article supplement (doi:10.1039/c3ta11337j), 2013-01-01
Supplement: c3ta11337j.pdf [file c3ta11337j.pdf]

## Supporting information

### Novel Nitrogen-containing Mesoporous Carbons Prepared from Chitosan

Andrzej Olejniczak,<sup>†,‡</sup> Maria Lezanska,<sup>\*,†</sup> Jerzy Wloch,<sup>†</sup> Anna Kucinska,<sup>†</sup> and  
Jerzy P. Lukaszewicz<sup>†</sup>

<sup>†</sup>Faculty of Chemistry, Nicolaus Copernicus University, ul. Gagarina 7, 87-100 Torun, Poland,

<sup>‡</sup>Flerov Laboratory of Nuclear Reactions, Joint Institute for Nuclear Research, Dubna, 141980, Russia

\*To whom correspondence should be addressed. Email adress: miriam@chem.uni.torun.pl

#### List of Figures

- S1 Dependence of silica-to-chitosan ratio on total pore volume.
- S2 XPS C1s profile of CAS40-1.0 sample.
- S3 XPS Si2p profile of CAS40-1.0 sample.
- S4 XPS O1s profile of CAS40-1.0 sample.
- S5 XPS O1s profiles of CAS40-1.0 and CAS40-2.50 samples. Deconvolution of a difference spectrum obtained by subtracting the spectrum of CAS40-1.0 sample from that of CAS40-2.50 sample.
- S6 Nitrogen sorption isotherms and PSDs of CAS40-2.5 samples carbonized at 1173 and 1373 K.

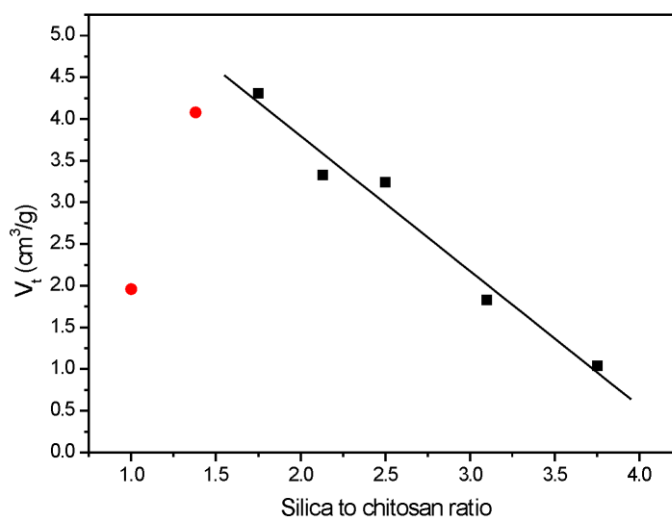

Figure S1: Dependence of silica-to-chitosan ratio on total pore volume.

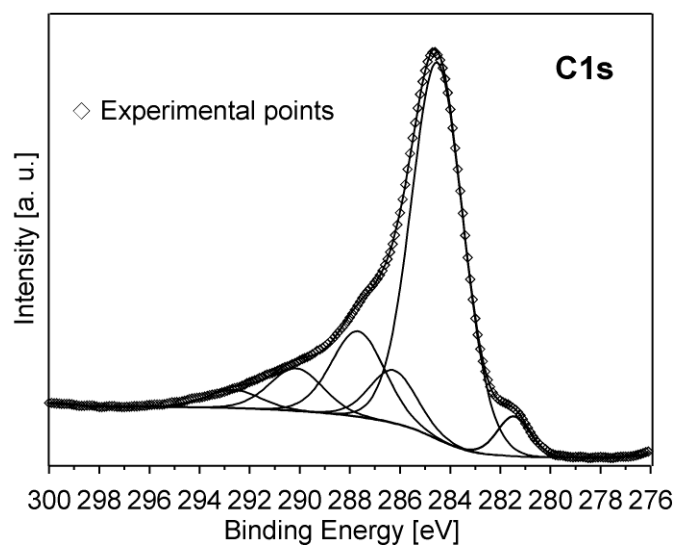

Figure S2: XPS C1s profile of CAS40-1.0 sample.

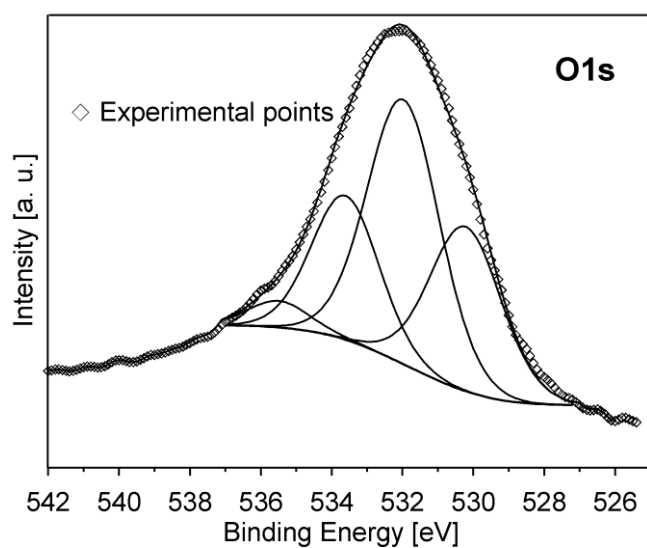

Figure S3: XPS Si2p profile of CAS40-1.0 sample.

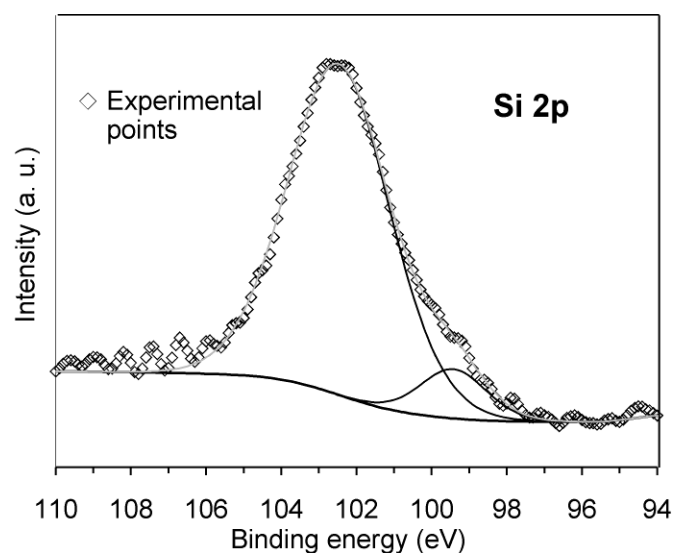

Figure S4: XPS O1s profile of CAS40-1.0 sample.

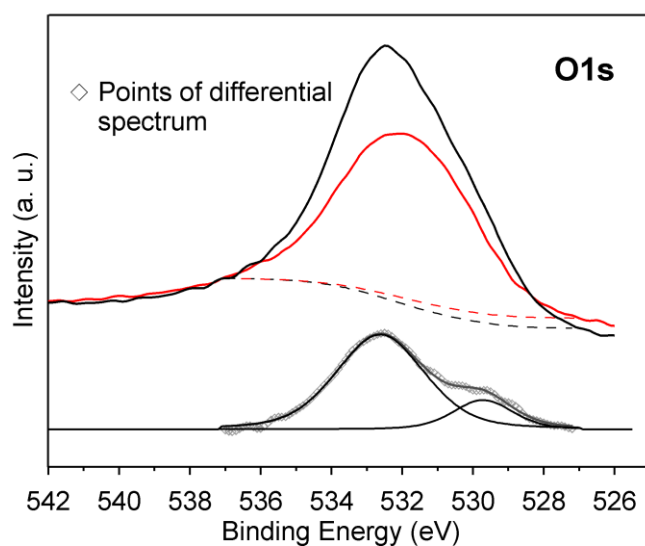

Figure S5: XPS O1s profiles of CAS40-1.0 (red line) and CAS40-2.50 (black line) samples (A). Deconvolution of a difference spectrum obtained by subtracting the spectrum of CAS40-1.0 sample from that of CAS40-2.50 sample (B).

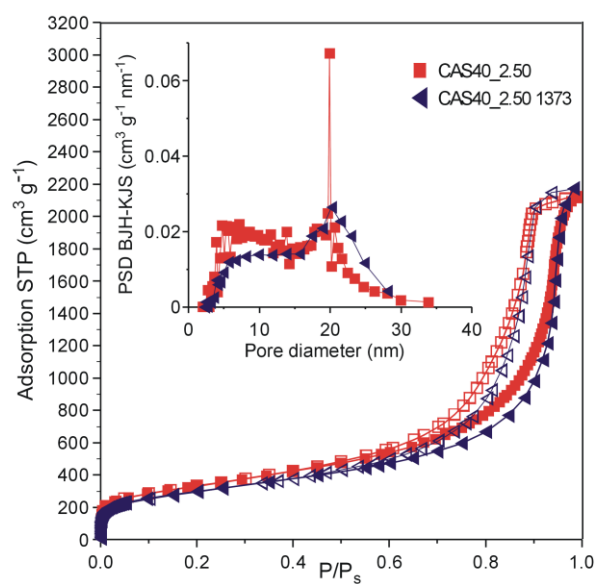

Figure S6: Nitrogen sorption isotherms and PSDs (insert) of CAS40-2.50 samples carbonized at 1173 and 1373 K, respectively.
